# Supplementary material for: A tetrahedron in a cube: a dodecanuclear ZnII benzoatecluster from the use of 2-pyridinealdoxime
Source: Royal Society of Chemistry journal article supplement (doi:10.1039/b918885a), 2009-12-15
Supplement: b918885a.pdf [file b918885a.pdf]

## **A tetrahedron in a cube: a dodecanuclear Zn<sup>II</sup> benzoate cluster from the use of 2-pyridinealdoxime†**

Konstantis F. Konidaris,<sup>a</sup> Eugenia Katsoulakou,<sup>a</sup> Michalis Kaplanis,<sup>a</sup> Vlasoula Bekiari,<sup>b</sup> Aris Terzis,<sup>c</sup> Catherine P. Raptopoulou,<sup>c</sup> Evy Manessi-Zoupa\*<sup>a</sup> and Spyros P. Perlepes\*<sup>a</sup>

<sup>a</sup> Department of Chemistry, University of Patras, 265 04 Patras, Greece. E-mails: [emane@upatras.gr](mailto:emane@upatras.gr) (E. M. -Z.), [perlepes@patreas.upatras.gr](mailto:perlepes@patreas.upatras.gr); (S.P.P.); Tel: +30 2610 997147 (E.M. -Z.), +30 2610 997146 (S. P. P.)

<sup>b</sup> Department of Aquaculture, Technological Educational Institute of Messolonghi, 30 200 Messolonghi, Greece

<sup>c</sup> Institute of Materials Science, NCSR "Demokritos", 153 10 Aghia Paraskevi Attikis, Greece

Preparation of the complexes

**[Zn(O<sub>2</sub>CPh)<sub>2</sub>(paoH)<sub>2</sub>]·MeOH (1·MeOH).** To a solution of paoH (122 mg, 1.0 mmol) in MeOH (10 mL) was added a solution of Zn(O<sub>2</sub>CPh)<sub>2</sub>·2H<sub>2</sub>O (173 mg, 0.5 mmol) in the same solvent (10 mL). The resulting colourless solution was stirred for 15 min and then allowed to slowly evaporate at room temperature. Prismatic colourless crystals of the product formed over 3 days. The crystals were collected by filtration, washed with cold MeOH (2x3 mL) and Et<sub>2</sub>O (5 mL), and dried in *vacuo*. Yield, 55%. The dried solid analyzed as solvent free **1**. Anal. Calcd. for C<sub>26</sub>H<sub>22</sub>ZnN<sub>4</sub>O<sub>6</sub>: C, 56.58; H, 4.03; N, 10.15. Found: C, 56.31; H, 4.12; N, 10.07%. IR (KBr, cm<sup>-1</sup>): 3596 wb, 3442w, 3062w, 3016w, 1858wb, 1654w, 1600m, 1544s, 1518sh, 1482m, 1436sh, 1398s, 1390sh, 1332m, 1306w, 1214w, 1154m, 1104w, 1058s, 1016m, 922m, 888m, 830m, 774m, 750w, 716s, 674s, 636m, 564wb, 520sh, 496m, 446m, 422m.

**[Zn<sub>12</sub>(OH)<sub>4</sub>(O<sub>2</sub>CPh)<sub>16</sub>(pao)<sub>4</sub>]·2MeCN·2H<sub>2</sub>O (2·2MeCN·2H<sub>2</sub>O).** To a solution of Zn(O<sub>2</sub>CPh)<sub>2</sub>·2H<sub>2</sub>O (334 mg, 1.0 mmol) in MeCN (10 mL) was added a solution of paoH (61 mg, 0.5 mmol) in the same solvent (20 mL). The resulting slurry was stirred for 30 min and then filtered to remove a small quantity of a white solid. The colourless filtrate was allowed to slowly evaporate at room temperature. Polyhedral colourless crystals of the product formed over a period of 1 week. The crystals were collected by filtration, washed with cold MeCN (2x5 mL) and Et<sub>2</sub>O (5 mL), and dried in *vacuo*. Typical yields were in the 30-40% range (based on the metal available). The dried solid analyzed as **2**·H<sub>2</sub>O. Anal. Calcd. for C<sub>136</sub>H<sub>106</sub>Zn<sub>12</sub>N<sub>8</sub>O<sub>41</sub>: C, 49.60; H, 3.25; N, 3.40. Found: C, 49.26; H, 3.30; N, 3.46%. IR (KBr, cm<sup>-1</sup>): 3424wb, 3066w, 1626s, 1606s, 1566s, 1494m, 1416vs, 1382s, 1328w, 1306w, 1176w, 1056m, 1024m, 932w, 888w, 846w, 776w, 718s, 678m, 646w, 456w.

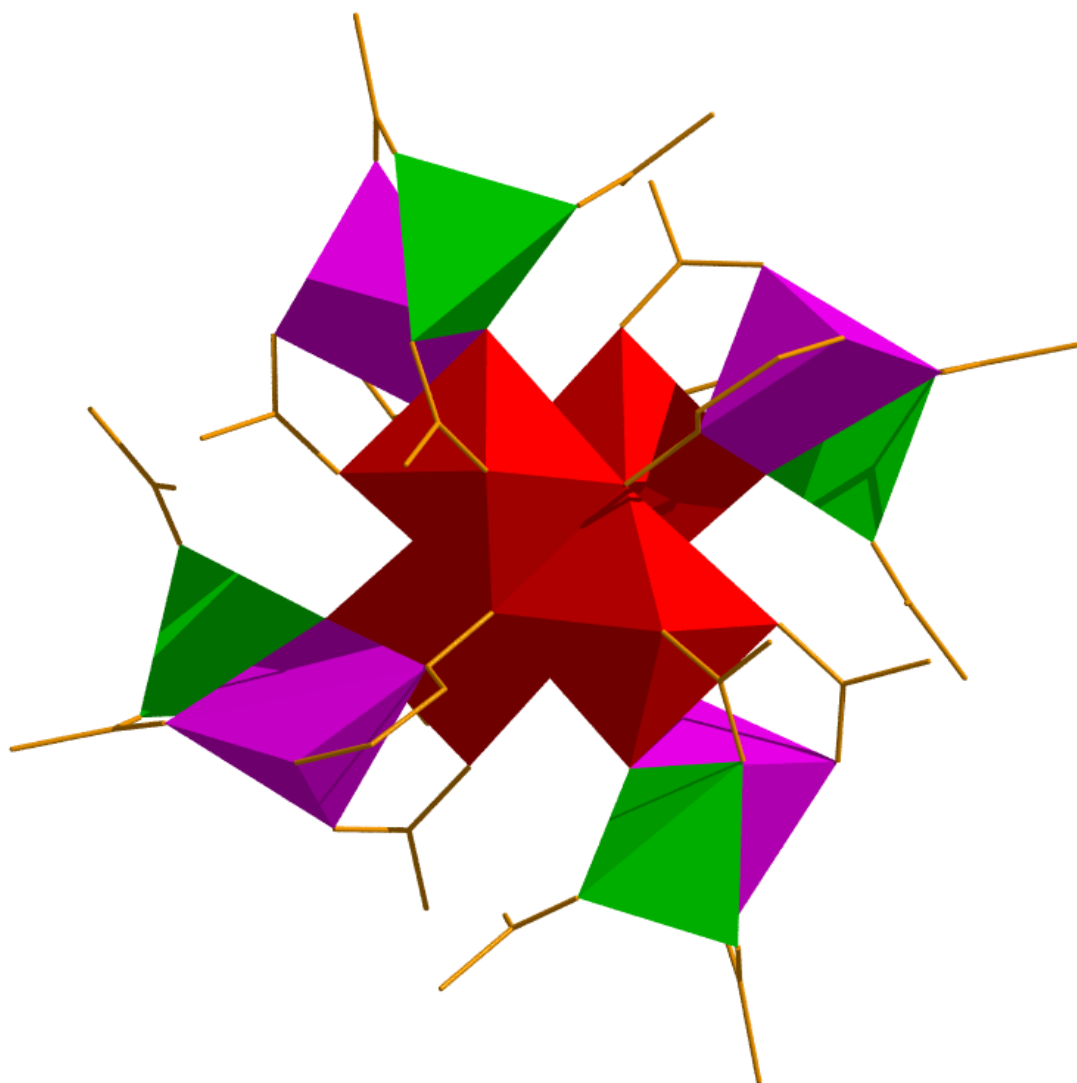

**Fig. S1** Polyhedral representation of cluster **2**. Colour code: Zn1 red, Zn2 purple, Zn3 green.

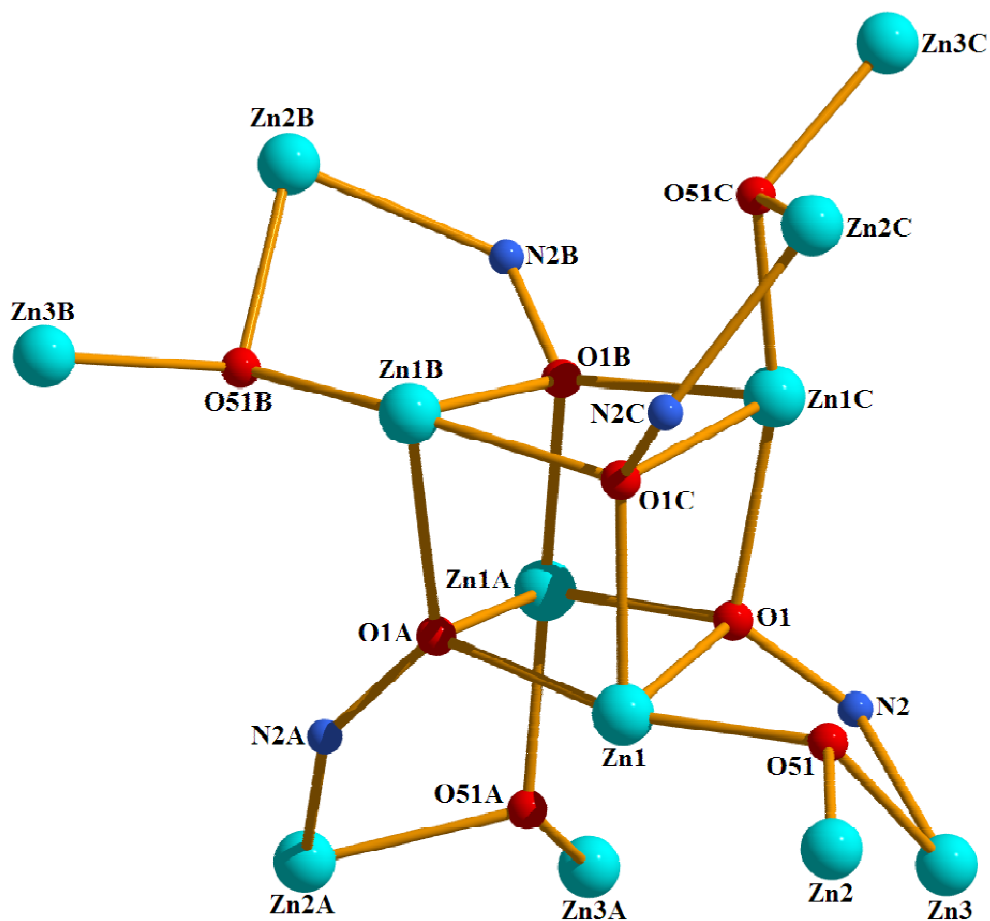

**Fig. S2** The  $[\text{Zn}_{12}(\mu_3\text{-OH})_4(\mu_4\text{-ONR}')_4]^{16+}$  core of complex **2** ( $\text{R}'\text{NO}^- = \text{pao}^-$ ). Colour code: Zn turquoise, O red, N blue.

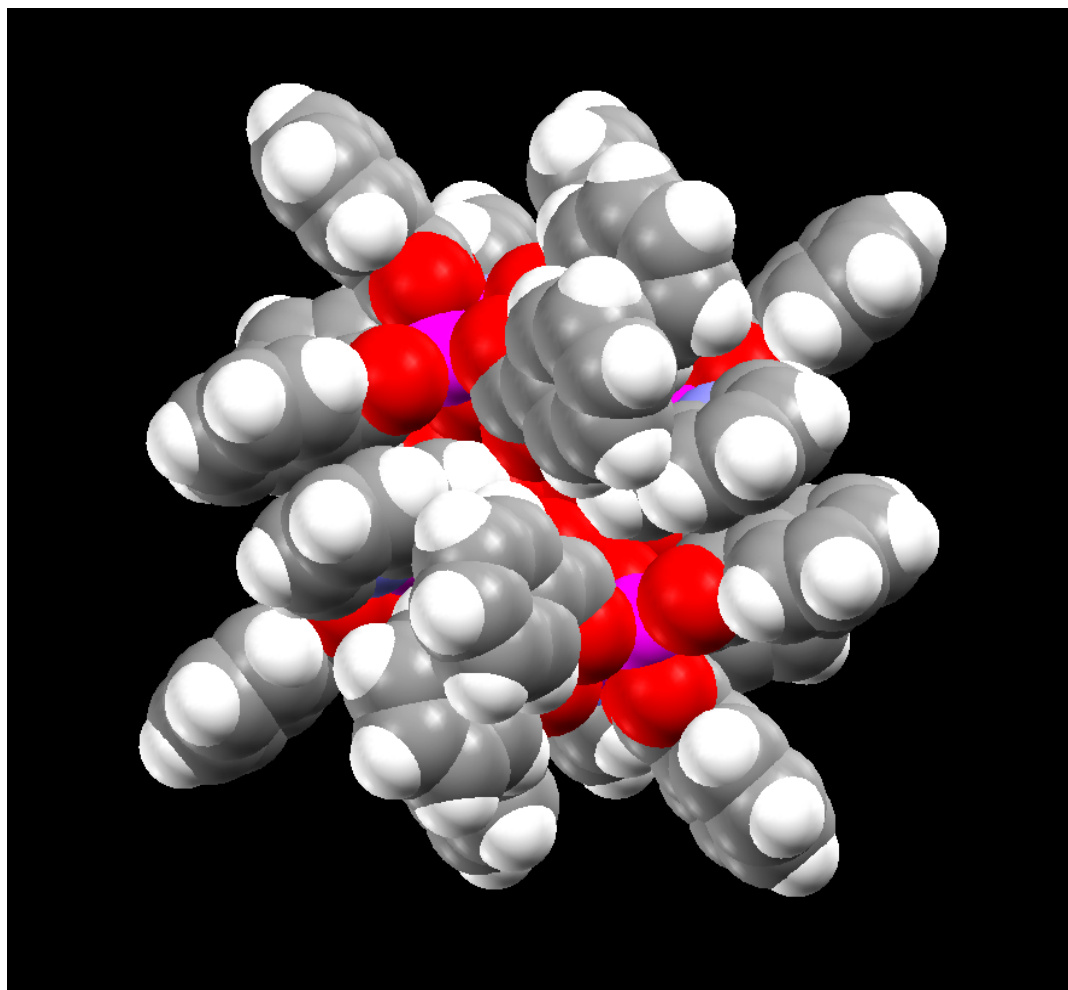

**Fig. S3** A space-filling diagram of **2**. Colour code: Zn magenta, O red, N blue, C grey.

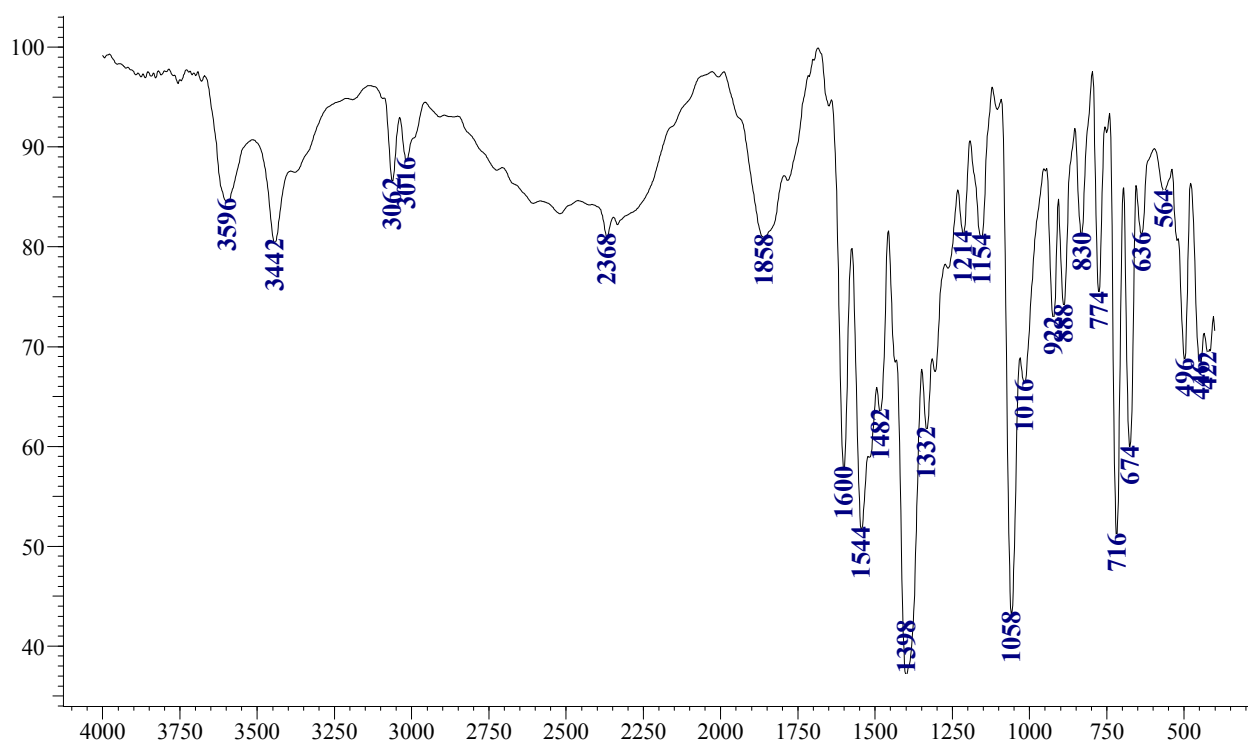

**Fig. S4** The IR spectrum (KBr, cm<sup>-1</sup>) of complex 1.

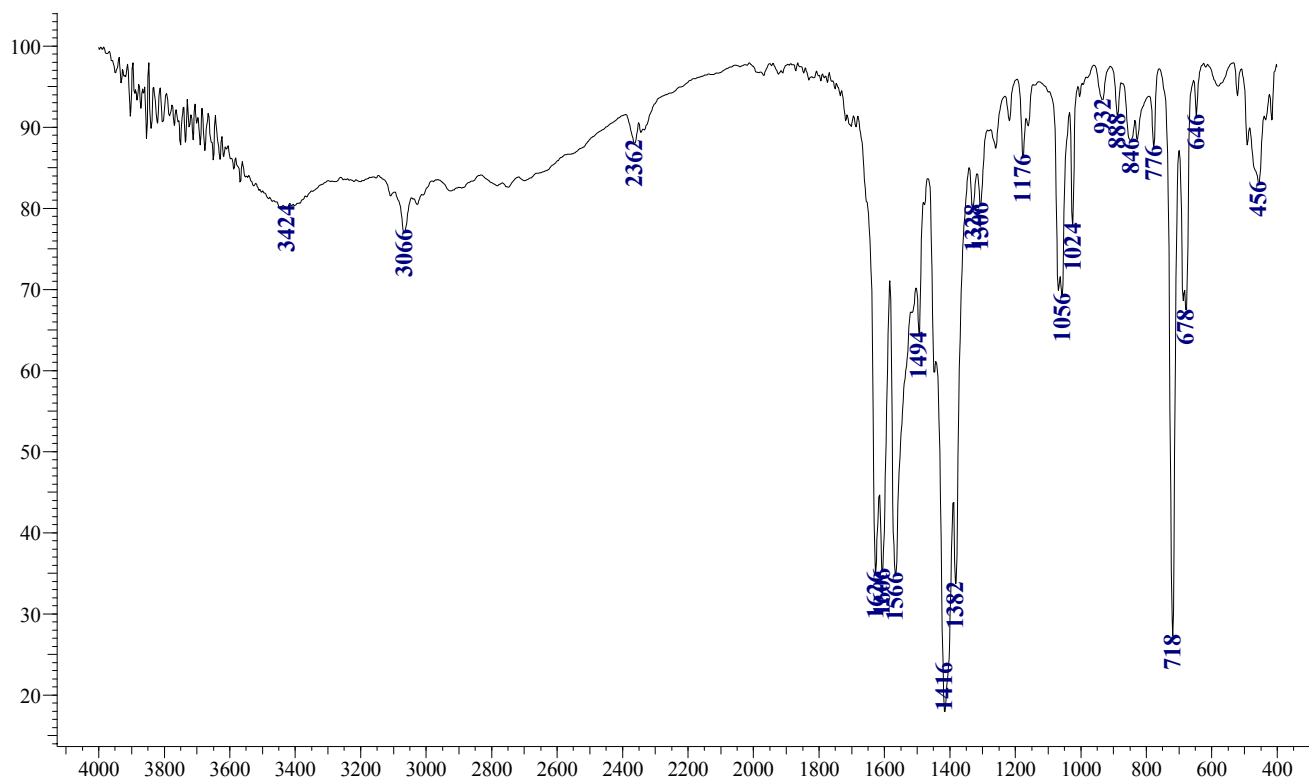

**Fig. S5** The IR spectrum (KBr, cm<sup>-1</sup>) of cluster 2.

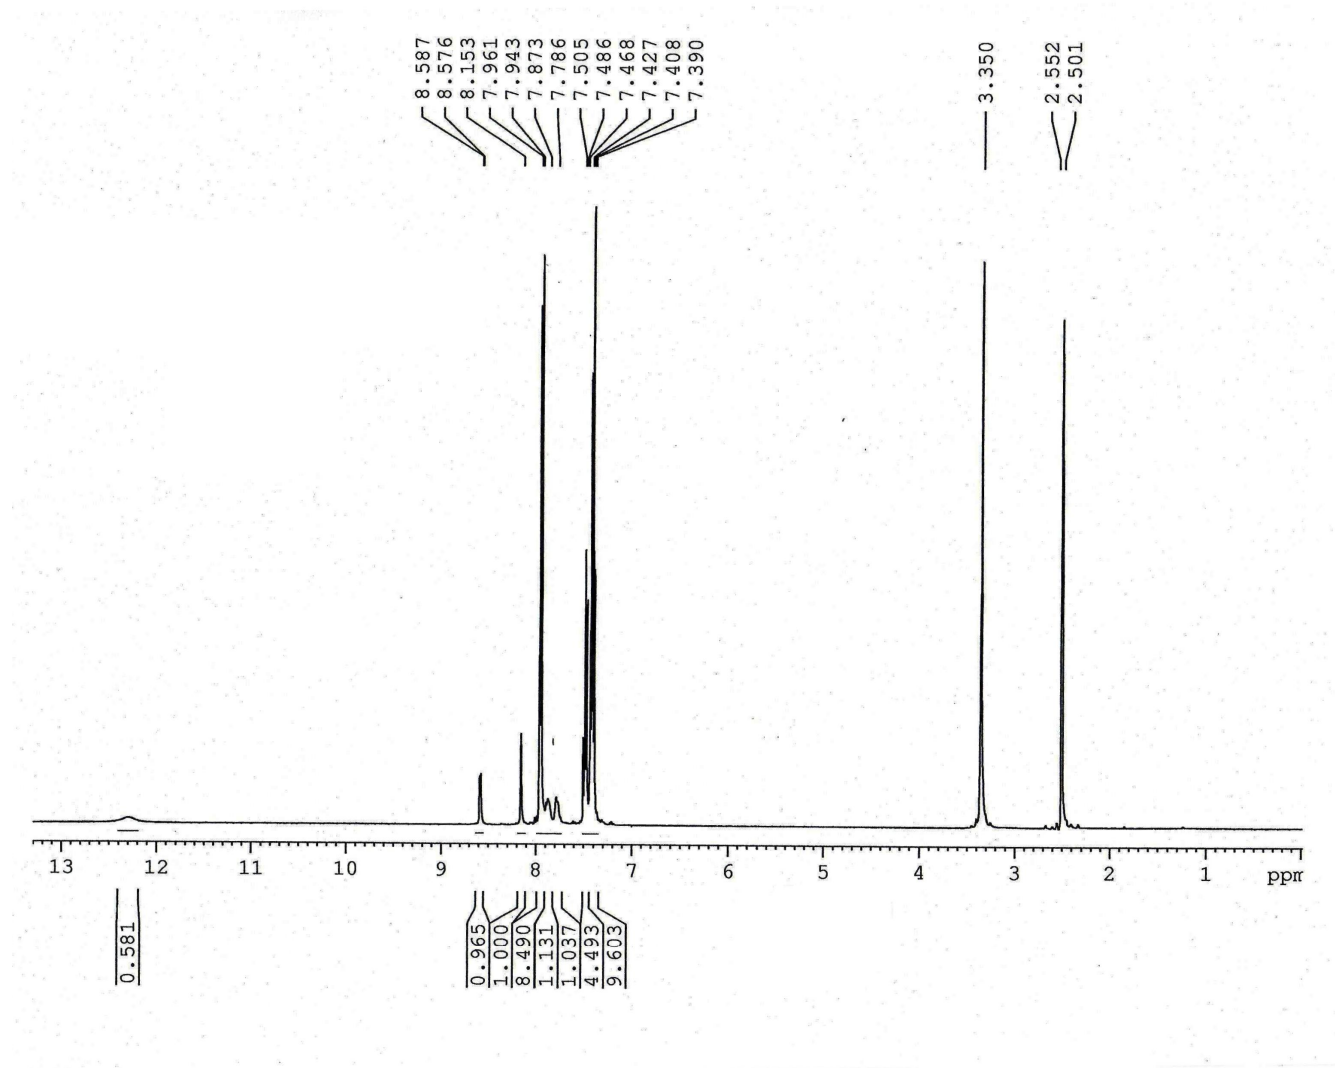

Fig. S6  $^1\text{H}$  NMR spectrum of cluster **2** in  $\text{DMSO-d}_6$ .
